# Supplementary material
Source: Springer Nature journal article supplement (https://www.springermedizin.de/resource/supplementary/12943_2012_1139_MOESM5_ESM.pdf/9552158)

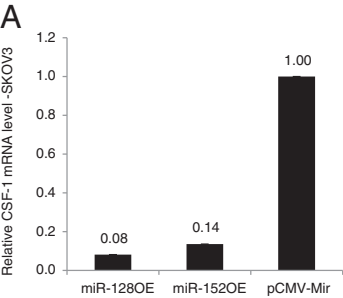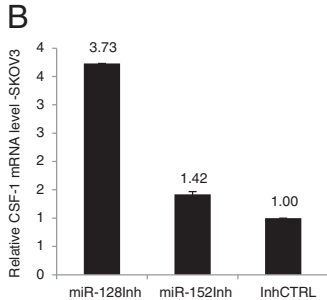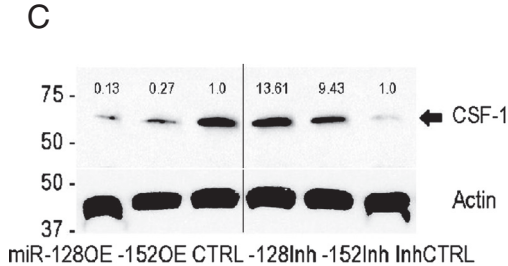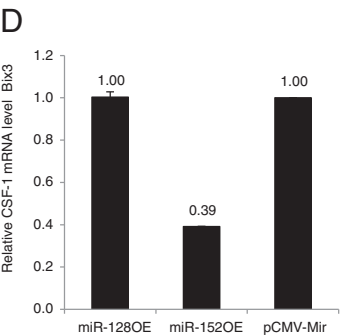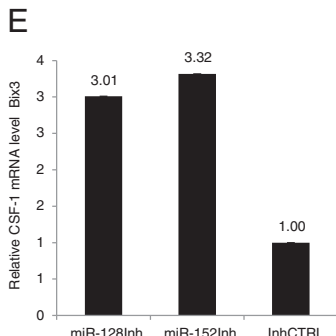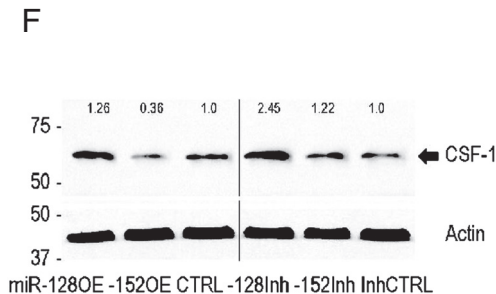

Supplement: MOESM5 [file 9552158]
